# Supplementary material
Source: ML conference proceedings conference paper supplement (https://openreview.net/forum?id=tp2nEZ5zfP)
Supplement: supplementary_material [file attachment]

## A NetHack Learning Environment

Both NetHack and the NetHack Learning Environment (NLE) feature a complex and rich observation space. The full observation space of NLE consists of many distinct (but redundant) components: *glyphs*, *chars*, *colors*, *specials*, *blstats*, *message*, *inv\_glyphs*, *inv\_strs*, *inv\_oclasses*, *screen\_descriptions*, *tty\_chars*, *tty\_colors*, and *tty\_cursor*.

The HiHack dataset, as well as all RL experiments in NLE conducted in this paper, consist of and rely solely upon the *tty\** view of the game.

## B Details on AutoAscend

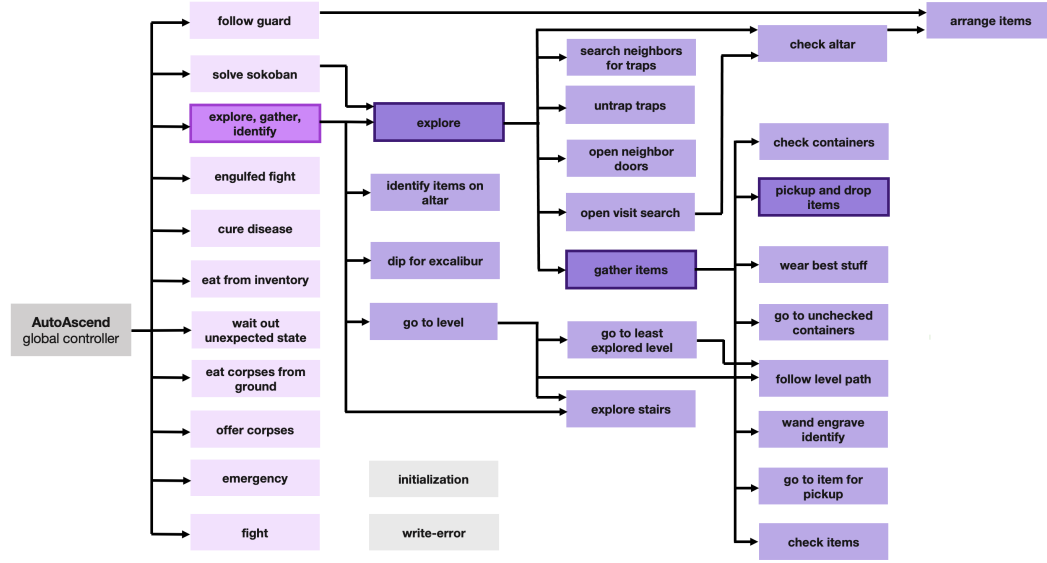

Figure 7: Full control flow structure of AutoAscend, separated across explicit *strategy* and *sub-strategy* routines. There are 13 possible “strategy” or hierarchical labels in HiHack, 11 representing the explicit *strategies* employed by the bot (in magenta) and two additional labels to handle extra-hierarchical behavior (in light-grey).

We include a comprehensive visualization of the full internal structure of AutoAscend in Figure 7. As indicated in the summary visualization of high-level AutoAscend strategies provided in Figure 2 of the main paper, the bot features 11 explicit, hard-coded *strategy* routines. These interface with other low-level *sub-strategy* routines, some which are re-used by multiple strategies or even multiple sub-strategies. One example of such a subroutine is the “arrange items” sub-strategy, which is called both by the “follow guard” strategy as well as by the “check altar” sub-strategy, which is itself a subroutine of the “explore” sub-strategy. When factorized across strategies and sub-strategies, the full structure of AutoAscend is a directed acyclic graph (DAG) with a maximal depth of 5 from the “root,” i.e. the AutoAscend *global controller* “node” indicated in dark gray above, which is re-directs global behavioral flow across strategies via a predicate-matching scheme.

The HiHack dataset includes a hierarchical strategy *label* for each timestep of AutoAscend interaction. As a result, alongside the 11 explicit strategies of the bot, there are two additional labels present in the dataset, which account for extra-hierarchical behavior in *ttyrec* game records yielded by the augmented *ttyrec* writer employed for HiHack generation and loading. These are visualized in light gray in Figure 7. The first of these corresponds to the hard-coded initialization routine employed by AutoAscend, effectively serving as a twelfth (albeit implicit) strategy, while the second covers *ttyrec* timestep records with missing strategy values. Missing strategy values may reflect *ttyrec* writer errors, or advancement of the underlying NetHack state by NLE rather than by agent, which occurs e.g., during NLE’s timeout-based termination of games [33]. Empirically, “write-error” strategy labels occur with very low-frequency in HiHack, representing less than  $\approx 0.05\%$  of all data.

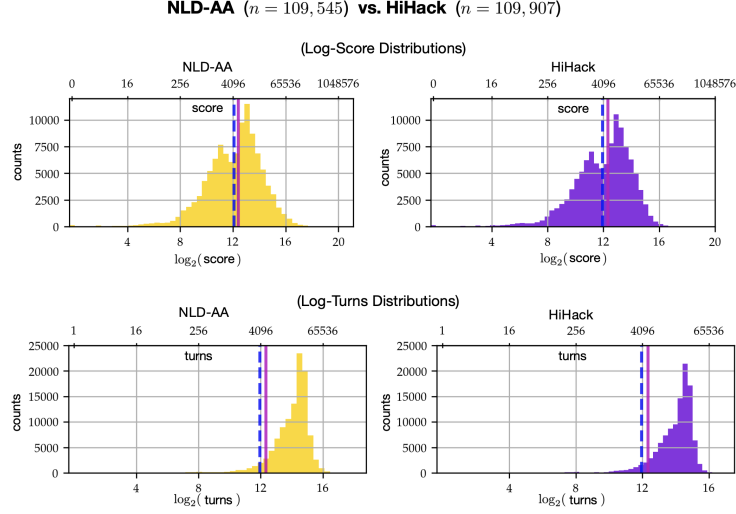

Figure 8: Distributional comparisons of basic AutoAscend game statistics in NLD-AA vs HiHack. Median and mean values (as reported in Table 1) are indicated respectively by vertical dashed-blue and solid-pink lines in each figure. *Top*: Log-score vs game counts in NLD-AA and HiHack. *Bottom*: Log-turns vs game counts in NLD-AA and HiHack.

## 487 C Details on HiHack

488 **Generation** All games in the HiHack dataset were recorded by running an augmented version  
 489 of AutoAscend in NLE v 0.9.0. This augmented version of the AutoAscend source features the  
 490 introduction of only a dozen extra lines of code that enable step-wise logging of the strategy trace  
 491 behind each action executed by the bot. This strategy trace is recorded directly to game `tttyrecs`  
 492 at each timestep via the addition of an extra channel to the C-based `tttyrec`-writer in the NetHack  
 493 source code. Each game was generated via a unique NLE environment seed.

494 **Game Statistics** The comparison of the full log-score and log-turns distributions across NLD-AA  
 495 and HiHack made in Figure 8 further supports the claim of high correspondence between the datasets  
 496 made in Section 3.3. Figure 9 shows the distribution of strategies across a sample consisting of  $\approx 10^8$   
 497 unique game transitions from HiHack. We observe coverage of all but the least frequent explicit  
 498 strategy executed by AutoAscend: the “solve sokoban” routine, employed a means to gain yet more  
 499 experience exclusively in highly advanced game states.

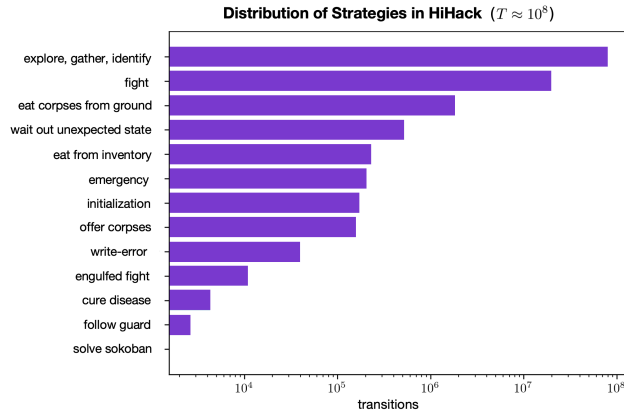

Figure 9: A visualization of the distribution of strategies across a sample of 4,300 HiHack games, containing a total of  $\approx 10^8$  transitions.

Table 3: **Training hyperparameter configurations** across all BC and APPO + BC experiments. Hyperparameters are listed in alphabetical order. We employ (§) to indicate hyperparameters only relevant for the corresponding hierarchical policy variants. The presence of the symbol ‘-’ in lieu of a parameter value reflects the parameter’s irrelevance for offline, BC experiments. All bolded hyperparameters were tuned. After tuning was complete, precisely the same sets of hyperparameters were employed to train models across individual policy classes belonging to the (LSTM)- and (Transformer + LSTM)-based model families explored in this paper, across all BC and APPO + BC experiments. Note that the abbreviation ‘CE’ denotes the cross-entropy loss function.

| Hyperparameter                 | BC       |                    | APPO + BC |                    |
|--------------------------------|----------|--------------------|-----------|--------------------|
|                                | LSTM     | Transformer + LSTM | LSTM      | Transformer + LSTM |
| actor batch size               | -        | -                  | 512       | 256                |
| adam beta1                     | 0.9      | 0.9                | 0.9       | 0.9                |
| adam beta2                     | 0.999    | 0.999              | 0.999     | 0.999              |
| adam eps                       | 1.00E-07 | 1.00E-07           | 1.00E-07  | 1.00E-07           |
| <b>adam learning rate</b>      | 0.0001   | 0.0002             | 0.0001    | 0.0001             |
| appo clip baseline             | 1        | 1                  | 1         | 1                  |
| appo clip policy               | 0.1      | 0.1                | 0.1       | 0.1                |
| baseline cost                  | 1        | 1                  | 1         | 1                  |
| crop dim                       | 18       | 18                 | 18        | 18                 |
| <b>discount factor</b>         | -        | -                  | 0.999     | 0.999              |
| entropy cost                   | -        | -                  | 0.001     | 0.001              |
| env max episode steps          | -        | -                  | 100000    | 100000             |
| env name                       | -        | -                  | challenge | challenge          |
| fn penalty step                | -        | -                  | constant  | constant           |
| <b>grad norm clipping</b>      | 4        | 1                  | 4         | 1                  |
| inference unroll length        | -        | -                  | 1         | 1                  |
| loss function                  | CE       | CE                 | CE        | CE                 |
| normalize advantages           | -        | -                  | ✓         | ✓                  |
| normalize reward               | -        | -                  | ✗         | ✗                  |
| num actor batches              | -        | -                  | 2         | 2                  |
| num actor cpus                 | -        | -                  | 10        | 10                 |
| penalty step                   | -        | -                  | 0         | 0                  |
| penalty time                   | -        | -                  | 0         | 0                  |
| pixel size                     | 6        | 6                  | 6         | 6                  |
| reward clip                    | -        | -                  | 10        | 10                 |
| reward scale                   | -        | -                  | 1         | 1                  |
| <b>RL loss coeff</b>           | -        | -                  | 1         | 0.001              |
| <b>strategy loss coeff (§)</b> | 1        | 1                  | 1         | 1                  |
| <b>supervised loss coeff</b>   | 1        | 1                  | 0.001     | 1                  |
| ttyrec batch size              | 512      | 512                | 256       | 256                |
| ttyrec cores                   | 12       | 12                 | 12        | 12                 |
| ttyrec <b>envpool size</b>     | 4        | 6                  | 4         | 3                  |
| ttyrec <b>unroll length</b>    | 32       | 64                 | 32        | 64                 |
| use prev action                | ✓        | ✓                  | ✓         | ✓                  |
| <b>virtual batch size</b>      | 512      | 1024               | 512       | 512                |

## D Training Details

**Hyperparameters** All relevant training hyperparameter values, across model families as well as BC vs APPO + BC experiment variants, are displayed in Table 3.

To kick-start all experiments, we employed the training hyperparameter values reported in Hambro et al. [24]. For several hyperparameters, however, additional tuning was conducted. These hyperparameters are indicated in bold in Table 3. Tuning across these hyperparameters was performed once for the “default” representative policy class from each of the LSTM and Transformer + LSTM model families for all but the Model Scaling experiments<sup>1</sup>. After tuning was complete, hyperparameter

<sup>1</sup>Prior to the start of these experiments, additional tuning of the “adam learning rate” and “ttyrec batch size” hyperparameters was conducted for the Transformer + LSTM (large) policy class. However, across the set of values tested, the same values were found to be optimal for this model configuration as for the default

configurations were fixed across all succeeding offline and combined offline + online experiments. Specifications of hyperparameter values swept over during tuning are provided in Table 4.

All models were trained with the Adam optimizer [30] and a fixed learning rate. We experimented with the introduction of a learning rate schedule for Transformer + LSTM models, but we found no additional improvements in policy prediction error or evaluation performance at the conclusion of training to be yielded by such a schedule.

**Random Seeds** For each of the hierarchical behavioral cloning, model parameter scaling, data scaling, and combined imitation and reinforcement learning experiments described in Sections 4, 5, and 6 of this paper, a total of 6 random seeds were run across all relevant policy classes. Randomized quantities included: policy parameter values at initialization, data loading and batching order, HiHack dataset subsampling (in data scaling experiments only), and initial environment seeding (in APPO + BC experiments only).

**Training Infrastructure and Compute** The RPC-based `moolib` library for distributed, asynchronous machine learning was employed across all experiments [38]. All data loading and batching was parallelized. Our model training code builds heavily upon the code open-sourced by Hambro et al. [24].

Experiments were run on compute nodes on a private high-performance computing (HPC) cluster equipped either with a NVIDIA RTX-8000 or NVIDIA A100 GPU, as well as 16 CPU cores. All policies were trained for a total of 48 hours. We detected no substantial differences in training frames-per-second (FPS) rates for both offline and online experiments across compute nodes in “speed-run” tests, provided nodes were under no external load. When running experiments, we did detect some variance in total optimization steps completed under the 48-hour constrained computational budget across seeds belonging to single policy classes, which we attribute to variance in external HPC cluster load during these runs.

Table 4: **Training hyperparameter tuning sweeps.** We specify the hyperparameter values tested during tuning sweeps conducted for the “default” representatives of each model class. Full specifications of final hyperparameter values employed in experiments are included in Table 3.

|                       | Sweep Range                    |
|-----------------------|--------------------------------|
| adam learning rate    | {0.0001, 0.0002, 0.0005, 0.01} |
| discount factor       | {0.9, 0.99, 0.999, 0.9999}     |
| grad norm clipping    | {0.1, 1, 4}                    |
| RL loss coeff         | {0.001, 0.01, 1}               |
| strategy loss coeff   | {0.001, 0.01, 1, 10}           |
| supervised loss coeff | {0.001, 0.01, 1}               |
| tyrec envpool size    | {3, 4, 6}                      |
| tyrec unroll length   | {16, 32, 64, 128}              |
| virtual batch size    | {128, 256, 512, 1024}          |

## E Model Architectures

A description of all model components and policy architectures is given in Tables 5 and 6, separated across (LSTM)- and (Transformer + LSTM)- model families. The PyTorch library was used for to specify all models, loss functions, and optimizers [42].

**Additional Transformer Specifications** All Transformer modules tested in this paper consist purely of “Transformer-Encoder” layers. Each layer is configured with 16 attention heads per attention mechanism, and layer normalization applied prior to all attention and feed-forward operations. A dropout of 0.1 is used during training [56]. Unlike the rest of the modules we employ, which use Exponential Linear Unit (ELU) activation functions as per the original CDGPT model architecture [23], our Transformer modules employ Gaussian Error Linear Unit (GeLU) activations [25].

Transformer + LSTM policy; hence, only a single set of hyperparameter values for the model family is reported here.

Table 5: **(LSTM)**-based policy architectural details. The final three columns indicate the presence (or absence) of each component across the relevant policy classes, whether trained with BC or APPO + BC.

| Class | Type        | Module(s)    | Hidden Dim | Layers | Activ. | Copies | Policy Class |                |           |
|-------|-------------|--------------|------------|--------|--------|--------|--------------|----------------|-----------|
|       |             |              |            |        |        |        | LSTM         | LSTM + XXL dec | Hier LSTM |
| Enc   | Message     | MLP          | 128        | 2      | ELU    | -      | ✓            | ✓              | ✓         |
| Enc   | Blstats     | Conv-1D, MLP | 128        | 4      | ELU    | -      | ✓            | ✓              | ✓         |
| Enc   | Pixel Obs   | Conv-2D, MLP | 512        | 5      | ELU    | -      | ✓            | ✓              | ✓         |
| Enc   | Action Hist | one-hot      | 128        | -      | -      | -      | ✓            | ✓              | ✓         |
| Core  | -           | LSTM         | 512        | 1      | -      | -      | ✓            | ✓              | ✓         |
| Dec   | Default     | MLP          | 512        | 1      | -      | -      | ✓            | ×              | ×         |
| Dec   | XXL         | MLP          | 1024       | 2      | ELU    | -      | ×            | ✓              | ×         |
| Dec   | Hier Strat  | MLP          | 128        | 1      | -      | -      | ×            | ×              | ✓         |
| Dec   | Hier Action | MLP          | 256        | 2      | ELU    | 13     | ×            | ×              | ✓         |

Table 6: **(Transformer + LSTM)**-based policy architectural details. As in Table 5, the final three columns indicate the presence (or absence) of each component across the relevant policy classes, whether trained with BC or APPO + BC.

| Class | Type        | Module(s)     | Hidden Dim | Layers | Activ. | Copies | Policy Class    |                         |                      |
|-------|-------------|---------------|------------|--------|--------|--------|-----------------|-------------------------|----------------------|
|       |             |               |            |        |        |        | Trnsfrmr + LSTM | Trnsfrmr + LSTM (large) | Hier Trnsfrmr + LSTM |
| Enc   | Message     | MLP           | 128        | 2      | ELU    | -      | ✓               | ✓                       | ✓                    |
| Enc   | Blstats     | Conv-1D, MLP  | 128        | 4      | ELU    | -      | ✓               | ✓                       | ✓                    |
| Enc   | Pixel Obs   | Conv-2D, MLP  | 512        | 5      | ELU    | -      | ✓               | ✓                       | ✓                    |
| Enc   | Action Hist | one-hot       | 128        | -      | -      | -      | ✓               | ✓                       | ✓                    |
| Enc   | Recurrent   | LSTM (frozen) | 512        | 1      | -      | -      | ✓               | ✓                       | ✓                    |
| Core  | Default     | Trnsfrmr      | 1408       | 3      | GeLU   | -      | ✓               | ×                       | ✓                    |
| Core  | Large       | Trnsfrmr      | 1408       | 6      | GeLU   | -      | ×               | ✓                       | ×                    |
| Dec   | Default     | MLP           | 512        | 1      | -      | -      | ✓               | ✓                       | ×                    |
| Dec   | Hier Strat  | MLP           | 512        | 1      | -      | -      | ×               | ×                       | ✓                    |
| Dec   | Hier Action | MLP           | 512        | 2      | ELU    | 13     | ×               | ×                       | ✓                    |

542 **Context Length** Models belonging to all policy classes from the (LSTM)-family are trained by  
543 sequentially “unrolling” batched-predictions. The length of this “unrolled” sequence is held fixed  
544 throughout training, and is specified by the value of the “`ttyrec unroll length`” hyperparameter in  
545 Table 3.

546 A fixed context length is also used to train the core Transformer modules of models belonging to  
547 classes from the (Transformer + LSTM)-family, similarly specified via the “`ttyrec unroll length`”  
548 hyperparameter. We found causally masking context in Transformer attention mechanisms to be  
549 greatly beneficial towards improving the generalization capability of models. The pre-trained frozen  
550 LSTM “recurrent encoder” module of these networks provides a very simple means of dramatically  
551 extending the effective context length of these models to cover full NetHack games, which may span  
552 hundreds of thousands of keypresses, without substantially slowing model training.

553 **Hierarchical Policy Variants** As alluded to in Tables 5 and 6, as well as in Section 4 of the main  
554 paper, all hierarchical policy variants are equipped with two sets of decoders: one high-level *strategy*  
555 *decoder* trained to predict the thirteen possible strategy labels in HiHack; as well as thirteen low-level  
556 *action decoders*, trained to predict actions corresponding to a single HiHack strategy across the 121-  
557 dimensional NLE action space [33]. Our hierarchical policies thus mimic the hierarchical structure  
558 of Autoascend, with an action decoder corresponding to each of the eleven, *explicit* strategies  
559 executed by the symbolic bot as well as two additional action decoders corresponding to the bot’s  
560 “initialization” routine (an *implicit* twelfth strategy) and “write-errors,” representing missing strategy

561 labels<sup>2</sup>, respectively, as introduced in Figure 7. A full, diagrammatic illustration of the Hierarchical  
 562 LSTM policy architecture is provided in Figure 3.

563 In all Hierarchical Behavioral Cloning (HBC) experiments, a BC loss was computed for the strategy  
 564 decoder via ground-truth, batched HiHack strategy labels, while a separate BC loss was computed  
 565 over a single action decoder over batched HiHack action labels, with this action decoder “selected”  
 566 in an end-to-end fashion by the strategy decoder. The action decoder “selection” procedure was  
 567 executed across batches by sampling predicted strategy indices from the strategy decoder with  
 568 Gumbel-Softmax re-parameterization, thus preserving gradient flow across the bi-level hierarchical  
 569 structure of policies during training. An illustration of the full Hierarchical LSTM policy architecture  
 570 is provided in Figure 3.

571 The strategy-specific BC loss component was re-weighted (via the “strategy loss coefficient” hyperpa-  
 572 rameter, introduced in Table 3) and recombined with low-level action decoder losses to produce a  
 573 single, overall HBC loss.

574 We resolved the presence of `ttyrec` transitions with missing strategy values, represented via the  
 575 “write-error” hierarchical label in HiHack, by extending the action-space of the hierarchical strategy  
 576 decoder to 13 and adding an additional hierarchical action decoder copy corresponding to this class  
 577 of labels. It is possible that the performance of hierarchical policy variants can be further improved  
 578 by instead filtering out all transitions with this property. We leave this evaluation for future work.

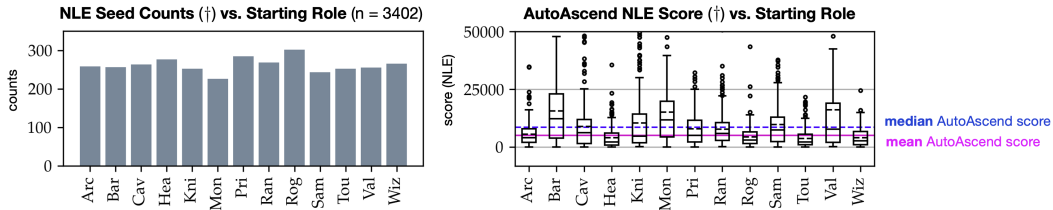

Figure 10: *Left*: The distribution of starting roles across the large-scale “in-depth evaluation.” As described above, this evaluation was run for the top-performing neural policy seeds (out of 6) across model class. We observe a near-uniform distribution of possible NLE roles across random seeds. *Right*: Autoascend NLE Score distribution vs. starting role in the “in-depth evaluation.” This figure is a companion to the visualizations of neural policy NLE scores across role in Figure 6. As in Figure 8, we indicate absolute median and mean values of AutoAscend NLE score in the “in-depth evaluation” with dashed-blue and solid-pink lines.

## 579 F Evaluation Details

580 For all policy classes belonging to the (LSTM)-model family, we observe monotonic improvements in  
 581 the performance of models on withheld instances of NLE as a function of training samples; as a result,  
 582 we employ the *final* training checkpoint of these policies when running evaluations across policy  
 583 seeds. In contrast, due to overfitting, the generalization capabilities of (Transformer + LSTM)-family  
 584 policies do not monotonically improve as a function of training samples. Thus, evaluations are  
 585 conducted only for the “best” checkpoints corresponding to each policy seed, as evaluated on the  
 586 basis of the rolling NLE score proxy metric. An in-depth description of this metric, as well as  
 587 experiment training curves supporting the claims of over- and underfitting across model classes, can  
 588 be found in Appendix G.

589 Two classes of evaluations are conducted in this paper for such checkpoints: a “standard evaluation”  
 590 of policy NLE score across randomly sampled and withheld instances of environment, and an “in-  
 591 depth evaluation,” recording all metrics of game-play and employing precisely the same set of seeded  
 592 environment instances to evaluate all policies.

593 The former policy evaluation procedure mirrors the one conducted during the NeurIPS 2021 NetHack  
 594 Challenge Competition [23]. This is the procedure we employ to compute the mean and median  
 595 NLE scores associated with policy seeds for all experiments in this paper as well as to compute the  
 596 estimates of AutoAscend mean and median NLE score in Table 2, producing our core results.

<sup>2</sup>Please refer to our discussion in Appendix B for more details.

The latter policy evaluation procedure yields a suite of more fine-grained metrics for informed and “human-like” game-play in NetHack, such as maximal dungeon level reached and the total life-time of the agent. We run this evaluation procedure for each of the best-performing<sup>3</sup> seeds from each neural policy class, as well as for AutoAscend. Metrics computed with this procedure are denoted via the (†) symbol throughout the paper.

**Standard Evaluation** Policies are evaluated on a randomly seeded batch of 1024 (withheld) NLE games. Only the final NLE scores at the end of game-play are recorded.

**In-Depth Evaluation** Policies are evaluated across precisely the same seeded batch of 3402 (withheld) NLE games, i.e. all agents play precisely the same set of starting roles across the same NLE dungeon configurations, none of which are covered in HiHack. All games are recorded to the `tttyrec` data format, and can be streamed *post-facto*.

A visualization of the distribution of starting roles covered in this evaluation, as well as the corresponding AutoAscend score distributions (factorized by role across game instances), are shown in Figure 10.

**Model Parameter Scaling: From 50.8M to 98.6M Parameter (Transformer + LSTM) Policies**

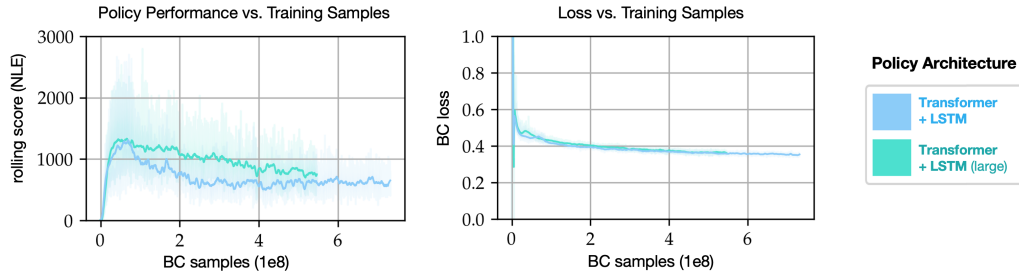

Figure 11: **Model parameter scaling experiment training curves.** In each plot, solid lines reflect point-wise averages across 6 random seeds, while shaded regions reflect point-wise min-to-max value ranges across seeds. *Left:* Rolling NLE evaluation score vs total BC training samples, for “default” and 2x deeper Transformer + LSTM policies. *Right:* BC loss vs total BC training samples.

## G Training Curves

We provide training curves reflecting all conducted experiments. In Figures 11 and 12, we display both *rolling NLE scores* as well as BC loss curves as a function of training samples, across all model and data scaling experiments presented in Section 5. In Figure 13, we display aggregate rolling NLE scores as a function of training samples for all remaining BC and APPO + BC experiments, separated according to model family.

**Rolling NLE Score** The rolling NLE score metric introduced and displayed in the figures discussed here reflects an evaluation of policy performance on withheld NLE instances conducted continually during model training in a “rolling” fashion via a fixed number of workers. As such, this metric is biased towards shorter-length games, with the value of smoothed rolling score as a function of training sample confounded by the policy-specific relationship between NLE score and total game turns. Rolling NLE score is thus *not* interchangeable with the large-batch “standard evaluations” employed elsewhere in this paper and presented in-depth in Appendix F. However, unlike BC loss, it serves as an efficient and useful (if noisy) proxy measure of policy generalization over the course of training.

**Model Parameter Scaling Training Curves** As shown in Figure 11, the generalization capability of Transformer + LSTM policies (approximated via rolling NLE score) peaks soon after the start of training, decaying and flattening out as training proceeds despite continued improvement in BC

<sup>3</sup>As indicated by overall mean NLE score in the “standard evaluation” procedure.



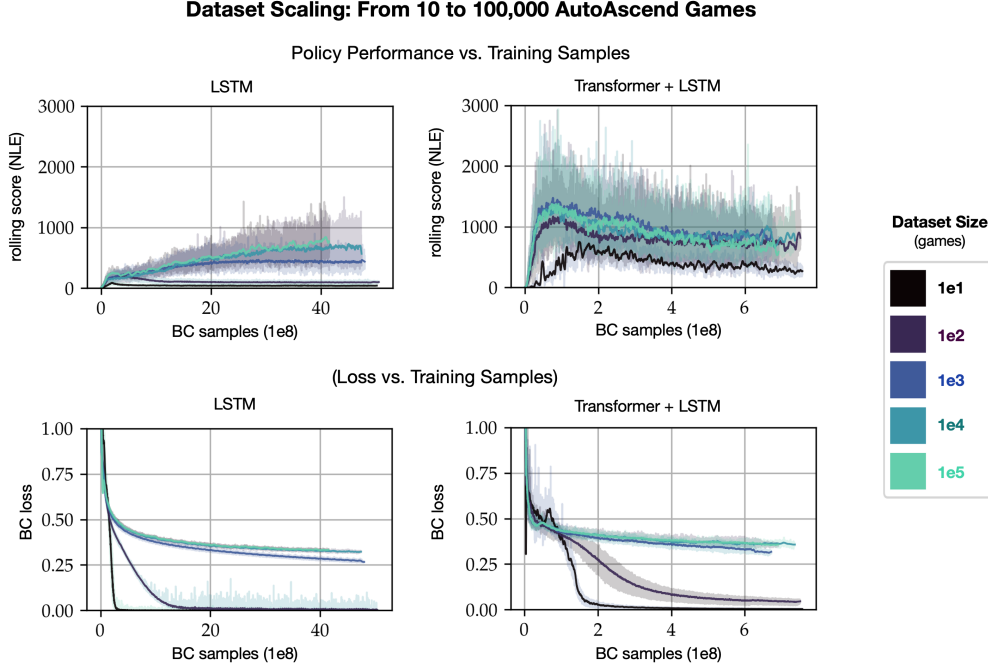

Figure 12: **Dataset scaling experiment training curves.** All experiments for a given dataset size were trained on a dataset sub-sampled without replacement from HiHack. The sub-sampling procedure was seeded. Training hyperparameters and model architectures were identical across all runs belonging to a single policy class. As in Figure 12, solid lines reflect point-wise averages across 6 random seeds, while shaded regions reflect point-wise min-to-max value ranges across seeds in all plots. *Top*: Rolling NLE evaluation score vs total BC training samples, across dataset sizes for the “LSTM” and “Transformer + LSTM” policy classes. *Bottom*: BC loss vs total BC training samples, across dataset sizes for the “LSTM” and “Transformer + LSTM” policy classes.

loss. This observation supports the claim made in Section 7 that Transformer-based models overfit to HiHack.

Despite the aforementioned noisy nature of rolling NLE score, the “Policy Performance vs. Training Samples” curves on the left of Figure 11 allude to our large-scale “standard evaluation” finding from Section 5; namely, that policy performance does not increase when model parameter count is scaled up, even after training hyperparameters are tuned. Similarly, the “Loss vs. Training Samples” curves on the right of this figure indicate nearly identical training errors across both models as a function of BC training samples.

**Dataset Scaling Training Curves** In Figure 12, we note that for datasets consisting of, or exceeding, 1,000 AutoAscend games, LSTM policies do not appear to overfit over the course of our BC experiments, with rolling NLE score consistently monotonically increasing as a function of BC training samples for all such policies. However, a positive relationship between dataset size and maximal rolling NLE score over training persists, indicating that the addition of more data does lead to measurable (if sub log-linear) improvements in policy generalization. An inspection of LSTM policy loss curves reveals a similar story. Losses across policy seeds trained on 10 and 100 AutoAscend games drop swiftly to values near zero, supporting this overfitting hypothesis.

The Transformer + LSTM policy loss curves in Figure 12 similarly reveal harsh overfitting for policies trained with 10 and 100 games. Interestingly, the generalization capability of these policies, again indicated by rolling NLE score over training, is vastly superior to that of their LSTM counterparts. Indeed, we observe that a Transformer + LSTM policy trained on just 100 games vastly outperforms a pure LSTM policy trained on 10x as many games. We attribute this gap to the frozen nature of the pre-trained LSTM component of the Transformer + LSTM policies employed as a “recurrent” encoder in these policies, and hypothesize that it is the static quality of the recurrent representation output



by this encoder which bolsters the generalization capability of the resultant models in exceptionally low-data regimes.

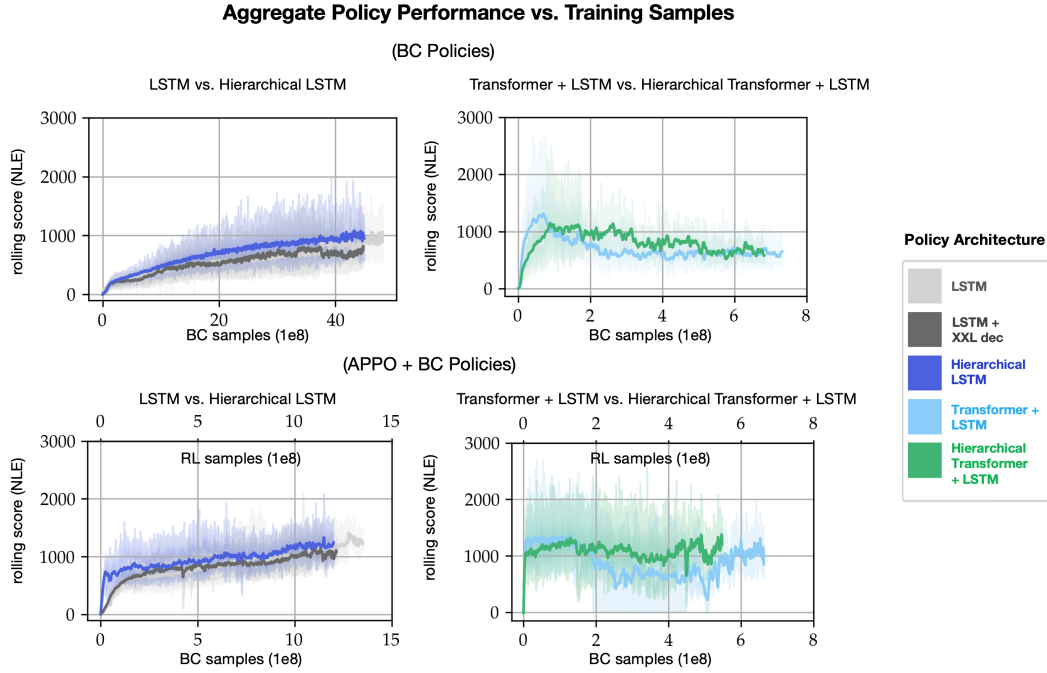

Figure 13: **Aggregate rolling NLE evaluation score curves for the central BC and APPO + BC experiments discussed in this paper.** Model parameter and dataset scaling training curves are omitted here on account of being visualized in Figures 11 and 12, respectively. For APPO + BC experiments, batch accumulation was employed to ensure that the ratio of RL to BC samples “seen” during training was 1:1. This property is indicated via the secondary x-axes of APPO + BC figures here, which show RL sample quantities. *Top:* Rolling NLE evaluation score vs total BC training samples in pure BC experiments, across non-hierarchical and hierarchical (LSTM) and (Transformer + LSTM)-based policy classes. *Bottom:* Rolling NLE evaluation score vs total BC training samples in APPO + BC experiments, across non-hierarchical and hierarchical (LSTM) and (Transformer + LSTM)-based policy classes.

**Aggregate BC and APPO + BC Training Curves** The “Aggregate Policy Performance vs Training Samples” curves of Figure 13 align with the general model family training trends previously observed in the scaling experiments. Notably, we find once again that (LSTM)-based policies’ rolling NLE scores improve monotonically with training samples whether training is conducted with BC or APPO + BC, while this is not the case for (Transformer + LSTM)-based models. Indeed, the generalization properties’ of policies belonging to this model family improve at the start of training before worsening as training proceeds across BC experiments. We interpret continued demonstration of these trends as further support for the claims of (LSTM)-underfitting and (Transformer + LSTM)-overfitting made in Section 7 of the main body of the paper as well as in Appendix F.

Moreover, we note that the introduction of an RL loss induces a particularly large amount of volatility in the rolling NLE score associated with (Transformer + LSTM)-based models, disrupting the monotonically decreasing relationship between rolling NLE score and training samples previously observed for these policies following  $2 \cdot 10^8$  training samples in the pure BC experiments. This observation suggests that the performance of these policies is likely bottlenecked by an insufficient throughput of “on-policy” or interactive data, as compared to their LSTM counterparts, which train on 2x as many samples in our compute-time constrained experimental setting.

**NLE Max Dungeon Level Reached (†) vs. Total Turns (†) Across Neural Policy Classes**

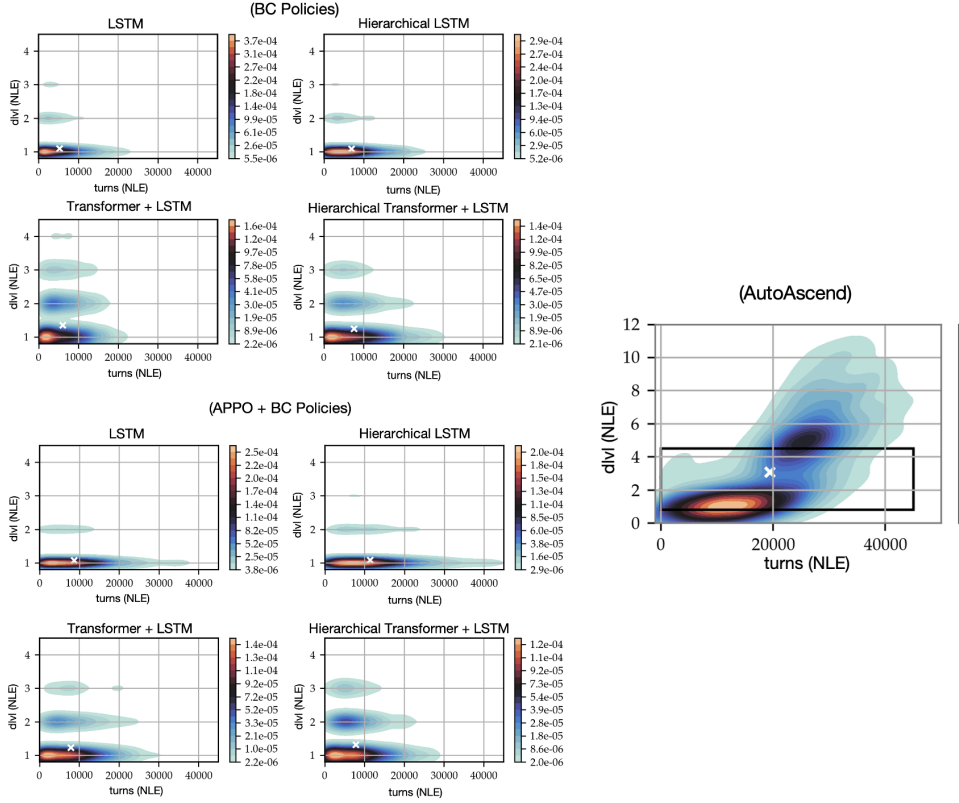

Figure 14: Max dungeon level reached vs. total turns across “in-depth evaluation” games, visualized via 2-D contour density plots. Contour densities are indicated by the color-bars accompanying each subplot. Mean quantity values (computed dimension-wise for all policies) across the “in-depth evaluation” batch are indicated by white ‘X’ symbols in each subplot. The symbolic bot’s vastly superior ability to play longer and descend much further into the dungeon creates a separation in scale between it and its neural counterparts; as a result, for clarity, we indicate the max dungeon level vs turns subspace displayed in the neural policy contours with a bolded black rectangle in our visualization of AutoAscend’s behavior. *Top Left*: Best-performing BC neural policy seeds. *Bottom Left*: Best-performing APPO + BC neural policy seeds. *Right*: AutoAscend.

## 670 H Distributional Visualizations of Evaluation Results

671 **Max Dungeon Level Reached vs. Total Turns** In Figure 14, we supplement the absolute mean  
672 and median max-dungeon level and agent life-time (in game turns) statistics introduced in Table 2  
673 with 2-D distributional visualizations of both the raw values of these metrics as well as their mutual  
674 inter-relationship, evaluated via  $n = 3402$  seeded NLE games run individually for all policy class  
675 representatives in our “in-depth evaluation.”

676 The AutoAscend 2-D contour plot on the right of this figure demonstrates an interesting emergent  
677 property of the bot’s behavior: the high-level “descent” behavior of AutoAscend appears to fall along  
678 one of two modes across games. In the first of these modes, the bot spends a very large amount of  
679 turns on dungeon level 1, and avoids descending further into the dungeon before the end of the game.  
680 In the second mode, the bot begins to rapidly descend fairly deep into the dungeon, reaching as far as  
681 level 11. The overall relationship between AutoAscend’s total in-game life-time and max-dungeon  
682 level reached appears to be roughly quadratic.

683 In contrast, none of the neural policy class representatives tested here comes close to achieving  
684 AutoAscend’s secondary behavior mode. A large majority of games for all neural policy classes  
685 appear to end on the first level of the dungeon, with policies very rarely surviving as long on this

level as AutoAscend in games belonging to its corresponding behavior mode. This suggests that neural policies may be failing to master the very low-level behaviors of the bot, even when these behaviors are factorized across AutoAscend strategies, as in the case of hierarchical policy variants.

Nevertheless, the qualitative performance of hierarchical policies clearly improves upon that of non-hierarchical models, with the Hierarchical Transformer + LSTM policy trained with BC both surviving longer of dungeon level 1 and descending with higher frequency than other BC-trained policy representatives. Furthermore, this qualitative behavior appears to be strengthened when interaction is added into the mix, with the mode centered on “dungeon level 2” increasing in density for the APPO + BC variant of the Hierarchical Transformer + LSTM representative policy.

Taken together, these sets of observations lead us to hypothesize that the quality of neural policies trained with imitation learning on extremely complex, long-horizon tasks like NetHack may be further improved with increases in the scale of hierarchically-informed behavioral factorization, beyond the scale of factorization explored in this paper. We consider this to be a very exciting direction for future work.

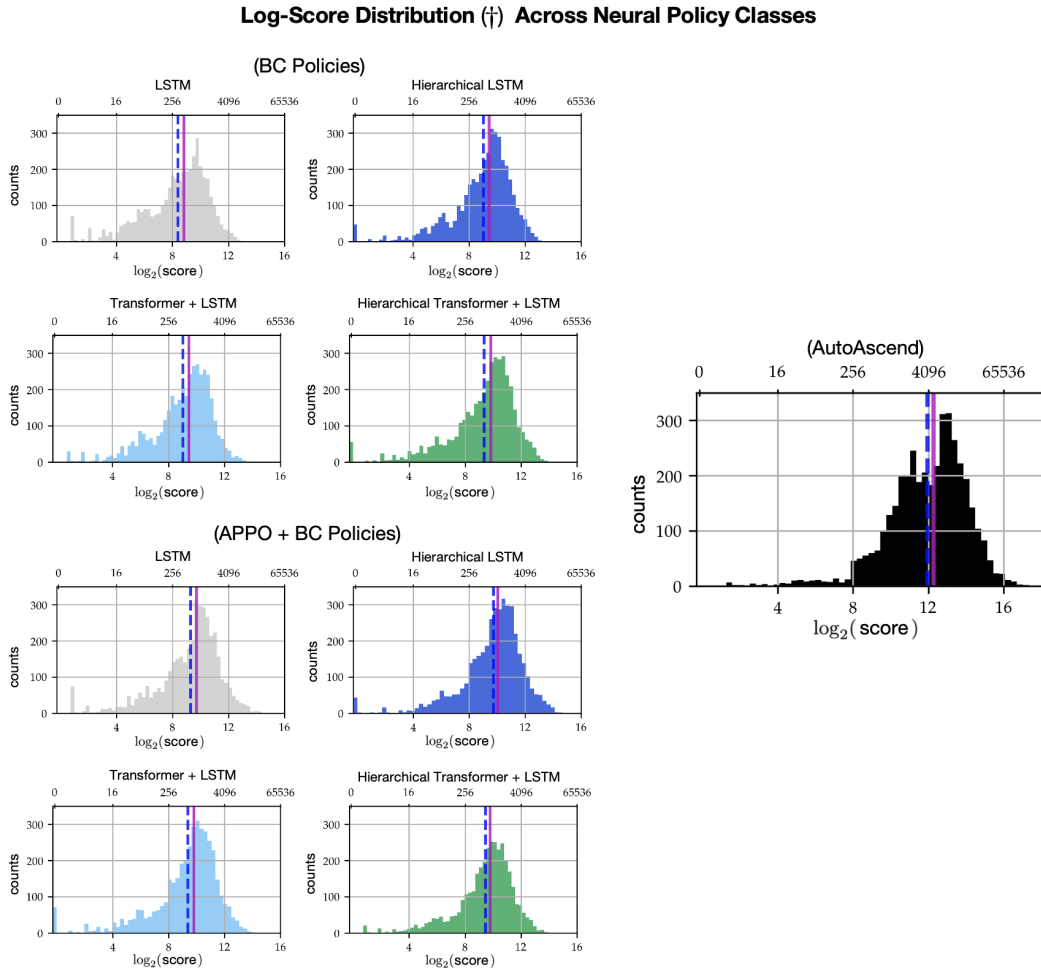

Figure 15: **Log-score distribution across “in-depth evaluation” games.** As in Figures 8 and 10, we indicate absolute median and mean values of policies’ NLE scores in the “in-depth evaluation” with dashed-blue and solid-pink lines. The introduction of an RL loss reduces the “mass” associated with the left-tail of log-score and increases the “mass” associated with the right-tail across all neural policy classes, inducing right-ward shifts in median and mean scores, though difficult to perceive in this figure on account of the log-scale of the x-axis. We refer the reader to Table 2 in the main paper for aggregate absolute numerical values of NLE score. *Top Left:* Best-performing BC neural policy seeds. *Bottom Left:* Best-performing APPO + BC neural policy seeds. *Right:* AutoAscend.

700 **Log-Score Distributions** We conclude this supplementary analysis with a visualization of log-score  
701 distributions across neural policy classes in Figure 15, computed over the “in-depth evaluation” seeded  
702 games. The trends displayed in this figure align with those described and demonstrated previously.  
703 Improvements in model architecture as well as the introduction of hierarchy and interactive learning  
704 lead to a re-distribution of “mass” between left and right tails of distribution, with the overall counts  
705 of “low score” games decreasing and “high score” games increasing when these improvements are  
706 applied. The gap to AutoAscend is significantly reduced, but not bridged.
