# Supplementary material
Source: ML conference proceedings conference paper supplement (https://openreview.net/forum?id=tp2nEZ5zfP)
Supplement: supplementary_material [file Makefile.doc]

#	NetHack Makefile (VMS) - for the [Unix] documentation.
#	NetHack 3.6	Makefile.doc	$NHDT-Date: 1524689428 2018/04/25 20:50:28 $	$NHDT-Branch: NetHack-3.6.0 $:$NHDT-Revision: 1.9 $
# Copyright (c) 2011 by Robert Patrick Rankin
# NetHack may be freely redistributed.  See license for details.

#  Copy this file to [.doc]Makefile. and edit it if needed.

GUIDEBOOK = Guidebook.		# regular ASCII file
#GUIDEBOOK = Guidebook.ps	# PostScript file
#GUIDEBOOK = Guidebook.dvi	# TeX device-independent file

ALLDOCS = $(GUIDEBOOK)
#ALLDOCS = $(GUIDEBOOK) manpages

NOOP = !

Guidebook :	$(GUIDEBOOK)
	$(NOOP)

# the basic guidebook
#Guidebook. :	Guidebook.mn
#	#tbl tmac.n Guidebook.mn | nroff | col -bx > Guidebook
#	write sys$output "Guidebook.mn cannot be processed under VMS."
Guidebook. :	Guidebook.txt		# distributed version of plain text
	copy Guidebook.txt Guidebook.

# Fancier output for those with ditroff, psdit and a PostScript printer.
#Guidebook.ps : Guidebook.mn
#	#tbl tmac.n Guidebook.mn | ditroff | psdit > Guidebook.ps
#	write sys$output "Guidebook.mn cannot be processed under VMS."
Guidebook.ps :	Guidebook.dvi		# generated with LaTeX
	dvi2ps Guidebook

# Guidebook.tex is the same as Guidebook.mn but formatted with LaTeX.
# - The invocation command for LaTeX may vary in different installations.
# - To print Guidebook.dvi you need to use a suitable dvi-driver.
# - LaTeX needs to be run twice; second pass uses Guidebook.aux made by first.
Guidebook.dvi :  Guidebook.tex
	latex Guidebook.tex
	latex Guidebook.tex

all : $(ALLDOCS)
	$(NOOP)

GAME	= nethack
MANDIR	= HACKDIR:
MANEXT	= man
#MANDIR = /usr/man/man6
#MANEXT = 6

# manual non-installation; raw man pages may be better than nothing
GAMEMANCREATE = copy nethack.6
LEVMANCREATE = copy lev_comp.6
DGNMANCREATE = copy dgn_comp.6
RCVRMANCREATE = copy recover.6
# GAMEMANCREATE = nroff -man nethack.6 >
# LEVMANCREATE = nroff -man lev_comp.6 >
# DGNMANCREATE = nroff -man dgn_comp.6 >
# RCVRMANCREATE = nroff -man recover.6 >

manpages :
	- $(GAMEMANCREATE) $(MANDIR)$(GAME).$(MANEXT)
	- $(LEVMANCREATE) $(MANDIR)lev_comp.$(MANEXT)
	- $(DGNMANCREATE) $(MANDIR)dgn_comp.$(MANEXT)
	- $(RCVRMANCREATE) $(MANDIR)recover.$(MANEXT)

spotless :
	- if f$search("Guidebook.")   .nes."" then  delete Guidebook.;*
	- if f$search("Guidebook.ps") .nes."" then  delete Guidebook.ps;*
	- if f$search("Guidebook.dvi").nes."" then  delete Guidebook.dvi;*
	- if f$search("Guidebook.aux").nes."" then  delete Guidebook.aux;*
	- if f$search("Guidebook.log").nes."" then  delete Guidebook.log;*
